# Supplementary material for: Impact and Sustainability of Antibiotic Stewardship on Antibiotic Prescribing in Visceral Surgery
Source: MDPI journal article supplement (doi:10.3390/antibiotics10121518), 2021-12-11
Supplement: s1 [file s1]

**Table S1** Antibiotic consumption for single substances for the four study wards comparing P1 and P2

|                             | W1 - P1<br>[DOT/100PD] | W1 - P2<br>[DOT/100PD] | W2 - P1<br>[DOT/100PD] | W2 - P2<br>[DOT/100PD] | W3 - P1<br>[DOT/100PD] | W3 - P2<br>[DOT/100PD] | W4 - P1<br>[DOT/100PD] | W4 - P2<br>[DOT/100PD] |
|-----------------------------|------------------------|------------------------|------------------------|------------------------|------------------------|------------------------|------------------------|------------------------|
| amoxicillin                 | 0.9                    | 0.0                    | 0.2                    | 0.0                    | 0.4                    | 0.0                    | 0.4                    | 0.0                    |
| amoxicillin/clavulanic acid | 0.0                    | 0.0                    | 4.0                    | 3.7                    | 3.9                    | 2.6                    | 2.9                    | 1.2                    |
| ampicillin                  | 0.0                    | 0.2                    | 0.0                    | 0.1                    | 0.0                    | 0.0                    | 0.0                    | 0.1                    |
| ampicillin/sulbactam        | 0.0                    | 0.0                    | 0.4                    | 0.2                    | 0.7                    | 0.9                    | 0.1                    | 0.1                    |
| azithromycin                | 0.0                    | 0.0                    | 0.0                    | 0.0                    | 0.0                    | 0.2                    | 0.0                    | 0.0                    |
| cefazolin                   | 0.0                    | 0.0                    | 1.4                    | 0.0                    | 0.0                    | 0.1                    | 1.0                    | 0.0                    |
| cefepime                    | 3.8                    | 1.6                    | 1.1                    | 0.0                    | 0.0                    | 1.2                    | 0.5                    | 1.6                    |
| cefpodoxime                 | 0.0                    | 0.0                    | 0.0                    | 0.0                    | 0.0                    | 0.8                    | 0.0                    | 0.0                    |
| ceftriaxone                 | 2.2                    | 0.4                    | 2.7                    | 2.5                    | 4.2                    | 0.5                    | 2.7                    | 2.0                    |
| cefuroxime                  | 4.2                    | 0.0                    | 3.9                    | 0.6                    | 3.0                    | 2.5                    | 2.0                    | 0.2                    |
| ciprofloxacin               | 5.5                    | 3.2                    | 13.6                   | 10.2                   | 10.5                   | 4.9                    | 9.5                    | 7.9                    |
| clarithromycin              | 1.6                    | 0.0                    | 0.5                    | 0.0                    | 0.4                    | 0.4                    | 0.5                    | 0.0                    |
| clindamycin                 | 1.1                    | 0.4                    | 4.4                    | 1.0                    | 2.0                    | 1.9                    | 1.3                    | 1.1                    |
| co-trimoxazole              | 0.0                    | 3.0                    | 0.6                    | 1.8                    | 0.5                    | 2.1                    | 0.2                    | 2.7                    |
| daptomycin                  | 0.0                    | 0.0                    | 0.0                    | 0.2                    | 0.0                    | 0.0                    | 0.0                    | 0.0                    |
| doxycycline                 | 0.0                    | 0.0                    | 0.0                    | 0.0                    | 0.0                    | 0.5                    | 0.0                    | 0.0                    |
| flucloxacillin              | 0.4                    | 0.4                    | 0.0                    | 0.0                    | 0.4                    | 0.2                    | 0.0                    | 0.0                    |
| fosfomycin                  | 0.0                    | 0.0                    | 0.1                    | 0.3                    | 0.1                    | 0.0                    | 0.4                    | 0.1                    |
| levofloxacin                | 0.0                    | 0.0                    | 0.0                    | 0.0                    | 0.0                    | 0.0                    | 0.0                    | 0.1                    |
| linezolid                   | 13.3                   | 12.7                   | 10.9                   | 8.6                    | 9.4                    | 8.0                    | 6.4                    | 12.1                   |
| meropenem                   | 23.5                   | 22.2                   | 14.2                   | 11.5                   | 9.8                    | 9.8                    | 10.8                   | 13.2                   |
| metronidazole               | 9.5                    | 3.6                    | 11.1                   | 6.5                    | 12.8                   | 5.5                    | 8.0                    | 4.3                    |
| moxifloxacin                | 1.5                    | 0.6                    | 3.2                    | 3.1                    | 0.5                    | 1.7                    | 2.0                    | 2.0                    |
| penicillin G                | 0.0                    | 0.0                    | 1.4                    | 0.0                    | 0.4                    | 2.4                    | 1.3                    | 0.2                    |
| penicillin V                | 0.0                    | 0.0                    | 0.0                    | 0.0                    | 0.0                    | 0.4                    | 0.2                    | 0.0                    |
| piperazillin/tazobactam     | 29.1                   | 30.1                   | 19.9                   | 16.1                   | 21.5                   | 21.4                   | 18.5                   | 24.5                   |
| tigecycline                 | 1.5                    | 1.6                    | 1.6                    | 0.0                    | 0.2                    | 0.6                    | 0.8                    | 0.6                    |
| vancomycin                  | 11.8                   | 1.4                    | 0.8                    | 1.9                    | 2.9                    | 0.7                    | 1.7                    | 0.4                    |
| overall                     | 109.6                  | 81.6                   | 96.1                   | 68.3                   | 83.6                   | 69.2                   | 71.3                   | 74.4                   |
